1                   **IS MODULAR CONTROL RELATED TO FUNCTIONAL OUTCOMES IN**  
2                   **INDIVIDUALS WITH KNEE OSTEOARTHRITIS AND FOLLOWING TOTAL KNEE**  
3                   **ARTHROPLASTY?**  
4

5                   Rebekah R. Koehn<sup>1</sup>, Sarah A. Roelker<sup>2</sup>, Xueliang Pan<sup>3</sup>, Laura C. Schmitt<sup>4-6</sup>, Ajit M.W.  
6                   Chaudhari<sup>1,4-8</sup>, Robert A. Siston<sup>1,4,5,7,8</sup>  
7

8                   <sup>1</sup>Department of Mechanical and Aerospace Engineering, The Ohio State University, Columbus,  
9                   OH, USA

10                  <sup>2</sup>Department of Kinesiology, University of Massachusetts Amherst, Amherst, MA, USA

11                  <sup>3</sup>Center for Biostatistics and Bioinformatics, The Ohio State University, Columbus, OH, USA

12                  <sup>4</sup>School of Health and Rehabilitation Sciences, The Ohio State University, Columbus, OH, USA

13                  <sup>5</sup>Sports Medicine Research Institute, The Ohio State University Wexner Medical Center,  
14                  Columbus, OH, USA

15                  <sup>6</sup>Division of Physical Therapy, School of Health and Rehabilitation Sciences, The Ohio State  
16                  University, Columbus, OH, USA

17                  <sup>7</sup>Department of Biomedical Engineering, The Ohio State University, Columbus, OH, USA

18                  <sup>8</sup>Department of Orthopaedics, The Ohio State University, Columbus, OH, USA  
19

20 Author Contributions:

21 RK: Performed data processing and analysis, performed statistical tests, performed data  
22 interpretation, drafted manuscript

23 SR: Contributed data and analysis tools, contributed to data interpretation, contributed to  
24 methods draft, critically revised manuscript

25 XP: Designed original study, contributed statistical analysis plan and tools, contributed to data  
26 interpretation

27 LS: Conceived and designed original study, contributed to data interpretation, contributed to  
28 methods draft

29 AC: Conceived and designed original study, contributed to data interpretation, critically revised  
30 manuscript

31 RS: Conceived and designed original study, data interpretation, critically revised manuscript,  
32 acquired funding  
33

34                   Word count: 5761  
35

36                   Key Words: total knee arthroplasty, gait, neuromuscular control, non-negative matrix  
37                   factorization  
38

39                   \*Address Correspondence to:

40                   Robert A. Siston

41                   Department of Mechanical and Aerospace Engineering

42                   Scott Laboratory

43                   201 W 19<sup>th</sup> Ave

44                   Columbus, OH 43210 USA

45                   Phone: 614-247-2721

46                   Email: [siston.1@osu.edu](mailto:siston.1@osu.edu)

47 **ABSTRACT**

48           Individuals who undergo total knee arthroplasty (TKA) for treatment of knee osteoarthritis  
49 often experience suboptimal outcomes. Investigation of neuromuscular control strategies in these  
50 individuals may reveal factors that contribute to these functional deficits. The purpose of this pilot  
51 study was to determine the relationship between patient function and modular control during gait  
52 before and after TKA. Electromyography data from 36 participants (38 knees) were collected from  
53 8 lower extremity muscles on the TKA-involved limb during at least 5 over-ground walking trials  
54 before (n=30), 6-months after (n=26), and 24-months after (n=13) surgery. Muscle modules were  
55 estimated using non-negative matrix factorization. The number of modules was determined from  
56 500 resampled trials for each participant. A higher number of modules was related to better  
57 performance-based and patient-reported functional measures before and 6-months after surgery.  
58 Participants were considered to have proper module organization if the composition of all modules  
59 was similar to healthy, age-matched controls. Participants with proper organization trended toward  
60 better function 24-months after surgery, though these results were not statistically significant. We  
61 also observed plasticity in the participants' modular control strategies, with 100% of participants  
62 who were present before and 24-months after surgery demonstrating changes in number of  
63 modules and/or the organization of at least 1 module. Our work suggests that functional  
64 improvements following TKA may initially present as increases in the number of modules  
65 recruited during gait. Once individuals can produce complex and discrete neuromuscular control  
66 patterns, further improvements may present as improved module organization.

67 **NEW & NOTEWORTHY**

68           This work is the first to characterize motor modules in TKA both before and after surgery  
69 and to demonstrate changes in the number and organization of motor modules over the time  
70 course of recovery, which may be related to changes in patient function. The plasticity of  
71 modular control in this population is a key finding which has not been previously documented  
72 and may be useful in predicting or improving surgical outcomes through novel rehabilitation  
73 protocols.

## 74 INTRODUCTION

75 Total knee arthroplasty (TKA) is the definitive end-stage treatment for knee osteoarthritis  
76 (KOA), with over 750,000 primary TKAs occurring in 2014 and over 1.25 million primary TKAs  
77 expected in the U.S. annually by 2030 (Sloan, Premkumar, and Sheth 2018). While TKA improves  
78 function in most patients, more than 20% of adults demonstrate functional deficits 2-years post-  
79 TKA (Singh et al. 2010). These functional deficits include slower walking speeds (Berman et al.  
80 1987), stiff-knee gait (Benedetti et al. 2003), and difficulty in stair descent (Wilson et al. 1996)  
81 and sit-to-stand transfer (Su, Lai, and Hong 1998). Several studies have suggested that these  
82 deficits are influenced by a variety of factors including implant design (Yercan et al. 2005),  
83 surgical technique (Stulberg, Loan, and Sarin 2002), ligament laxity and soft tissue balance  
84 (Jeffery, Morris, and Denham 1991), quadriceps strength (Bade, Kohrt, and Stevens-Lapsley  
85 2010), strength of the non-operated limb (Zeni and Snyder-Mackler 2010), and preoperative  
86 conditions (Smith, Lloyd, and Wood 2004). However, the primary factor or combination of factors  
87 which reliably predict patient outcomes has yet to be determined.

88 Several studies have also examined neuromuscular control as a factor which may explain  
89 the functional deficits seen in this population. One study found that TKA patients, both before and  
90 1-month after surgery, demonstrated higher co-activation of the quadriceps and hamstrings during  
91 stand-to-sit transfer and performed the five-times-sit-to-stand task more slowly than healthy adults  
92 (Davidson et al. 2013). Another study determined that TKA patients demonstrated quadriceps  
93 muscle activation deficits after surgery, but these deficits were not associated with quadriceps  
94 strength 3-months after TKA (Marmon and Snyder-Mackler 2014). Some work has also been done  
95 to investigate changes in patient function and neural control in this population from the  
96 preoperative to postoperative condition. Hubley-Kozey et al. (2010) studied patient function and

97 muscle activation patterns in patients before and 1-year following TKA and found that while  
98 functional improvements were accompanied by shifts in activation patterns toward the patterns of  
99 asymptomatic individuals, the patterns were still statistically different from the asymptomatic  
100 individuals. While these studies provide valuable insight into the influence of activation patterns  
101 on function in KOA and TKA, it is still unknown how these electromyography (EMG)-measured  
102 factors may change over the time course of recovery after surgery. Further, it remains unclear if  
103 changes in co-activations and muscle activation patterns are indicative of changes in the underlying  
104 neuromuscular control strategies. Since individual EMG waveforms alone do not provide insight  
105 into the underlying mechanisms of control, other tools are necessary in order to determine the  
106 influence of neuromuscular control on patient function.

107         The theory of modular muscle control has gained popularity as a tool to explore  
108 neuromuscular control (Ting and McKay 2007). The theory describes a simplified neural control  
109 strategy in which a group of muscles is activated synergistically by a common neural command,  
110 reducing the set of activation profiles used to complete a motion (W.A. Lee 1984). The number of  
111 these commands, or “motor primitives” (Mussa-Ivaldi, Giszter, and Bizzi 1994), and the  
112 organization of muscles within the modules which are selected out of an individual’s library of  
113 possible commands in order to complete a task, represent varying complexity of control patterns  
114 (Olree and Vaughan 1995; Ivanenko, Poppele, and Lacquaniti 2004; Ardestani et al. 2017). A  
115 higher number of modules used to complete a task, such as walking, may indicate a more complex  
116 neuromuscular control strategy and greater flexibility in control (Ardestani et al. 2017). Muscles  
117 that are organized into a specific module activate as a group according to the module’s timing  
118 profile, and recent literature has suggested that populations with neurologic movement disorders,  
119 including Parkinson’s disease, post-stroke hemiparesis, and incomplete spinal cord injury,

120 demonstrate altered module organization in comparison to healthy controls (Allen et al. 2017;  
121 Allen, Kesar, and Ting 2019; Clark et al. 2010; Hayes et al. 2014). To our knowledge, there has  
122 been only one study examining modular control in the TKA population. Ardestani et al. (2017)  
123 found that 1-year following a cruciate retaining (CR) TKA, a low-functioning group of participants  
124 demonstrated 2-3 motor modules while a high-functioning group demonstrated 4-5 modules, more  
125 closely resembling a healthy control group that demonstrated 5-6 modules. The results of that  
126 study suggest that the complexity of neural control strategy may be an underlying mechanism that  
127 contributes to the large range of post-operative functional outcomes observed in this population.  
128 However, the relationship between module organization and function has yet to be characterized  
129 in the TKA population. Additionally, it has been suggested that rehabilitation programs may  
130 influence the complexity and organization of modular control in individuals with spinal cord  
131 injuries or neurological disorders (Ting et al. 2015; Allen et al. 2017). However, it is still unknown  
132 whether changes in modular control exist in individuals with orthopaedic disorders and whether  
133 such changes may be related to the time course of functional improvements following surgical  
134 interventions, like TKA.

135         Therefore, the purpose of this pilot study was to determine the relationship between patient  
136 function and modular control during gait before and at multiple timepoints after surgery and to  
137 investigate the plasticity of neuromuscular control in the KOA and TKA populations. We  
138 hypothesized that better patient function before surgery, 6-months after surgery, and 24-months  
139 after surgery would be associated with (I) a higher number of modules and (II) module  
140 organization more similar to that of healthy controls. Additionally, we aimed to examine the  
141 relationship between changes in function and changes in the number and organization of modules  
142 over the time course of recovery from TKA.

## 143 **METHODS**

### 144 *Data Collection*

145           Thirty-six individuals (38 knees) with medial compartment KOA (19/19 R/L) provided  
146 written informed consent, in accordance with The Ohio State University's Institutional Review  
147 Board, prior to enrolling in this pilot study. This cohort is a superset of that reported in Freisinger  
148 et al. (2017), which examined gait biomechanics before surgery, and Chaudhari et al. (2019),  
149 which examined strength before and after surgery. All participants were scheduled to undergo a  
150 primary posterior-stabilizing (PS) TKA (Zimmer NexGen LPS Flex Knee) prior to study  
151 recruitment. By consensus, two fellowship-trained musculoskeletal radiologists determined the  
152 Kellgren-Lawrence classification (KL-grade) of each participant's right and left knees (Kellgren  
153 and Lawrence 1957).

154           The participants were tested in our motion analysis laboratory approximately 1-month  
155 before, 6-months after, and 24-months after undergoing surgery. Each participant performed a  
156 minimum of 5 over-ground walking trials. Surface electromyography (EMG) data were collected  
157 at 1500 Hz (Telemetry DTS System, Noraxon, Scottsdale, AZ) from 16 Ag/AgCl dual-electrodes  
158 (Peripheral Nerve Stimulation Dual Element Electrodes, rectangular, 1.625 in x 3.25 in, 0.42 in  
159 sensor diameter, 1.625 in inter-electrode distance, Vermed, Buffalo, NY) affixed over the bellies  
160 of 8 lower extremity muscles, bilaterally: rectus femoris, vastus lateralis, vastus medialis, biceps  
161 femoris, medial hamstrings, lateral gastrocnemius, medial gastrocnemius, and soleus. Prior to  
162 affixing the electrodes, the skin over each muscle was shaved to remove any hair and then cleansed  
163 and lightly abraded with alcohol wipes.

164           In addition to gait trials, several performance-based and patient-report measures of function  
165 were recorded. Each participant completed three clinical performance-based assessments: the

166 timed stair-climbing test (SCT) (Rejeski et al. 1995), the timed up-and-go test (TUG) (Dobson et  
167 al. 2013), and the six-minute walk test (6MW) (Kennedy et al. 2005). Each participant also  
168 provided self-reported functional data using four of the Knee Injury and Osteoarthritis Outcome  
169 Score (KOOS) (Roos and Lohmander 2003) survey subscales: pain, symptoms, activities of daily  
170 living (ADL), and quality of life (QOL). For each question, the participants' answers were scored  
171 on a scale from 0 to 4, with a higher score indicating better self-reported function. The scores were  
172 totaled within each subscale and normalized such that a maximum score of 100 represented high  
173 function and a minimum score of 0 represented poor function.

174         Due to high BMI (e.g.  $33.9 \pm 5.1$  kg/m<sup>2</sup> before TKA), a common trait in individuals with  
175 osteoarthritis, soft tissue motion artifact was present in the EMG data in many of the trials. Due to  
176 this motion artifact, several participants were excluded from the study. Additionally, all 36  
177 participants did not appear at all three data collection sessions. We were able to include data for  
178 30 participants before surgery, 26 participants at 6-months post-TKA, and 13 participants at 24-  
179 months post-TKA (Table 1).

180

### 181 *Identification of Muscle Modules*

182         We processed the EMG data for the TKA-involved limb from each gait trial to prepare for  
183 module extraction. The EMGs were demeaned and bandpass filtered to frequencies between 50  
184 Hz and 300 Hz (Butterworth, 6<sup>th</sup> order) due to higher levels of motion artifact associated with high  
185 body-mass index (BMI) values in this population, as recommended by Kieliba et al. (2018) and  
186 Santuz et al. (2017). The EMGs were then full-wave rectified and smoothed using a 6 Hz lowpass  
187 filter (Butterworth, 6<sup>th</sup> order). Trials with excessive motion artifact were excluded. We extracted  
188 the maximum number of available gait cycles from each participant, and those with fewer than 5



189 available gait cycles were excluded. Linear envelopes were formed by discretizing the data such  
190 that each trial contained 201 data points, accounting for every 0.5% of the gait cycle, concatenating  
191 all available gait cycles, and normalizing each muscle first to the maximum value across all gait  
192 cycles and then to unit variance (Torres-Oviedo and Ting 2007).

193 Muscle modules were calculated using non-negative matrix factorization (NMF) (D.D. Lee  
194 and Seung 1999). Given that neuron firing rates and strengths cannot be negative, NMF provides  
195 insight into an individual's neural control strategy that can be interpreted physiologically (Ting  
196 and McKay 2007). First, the linear envelopes for each subject were organized into  $m \times t$  matrices  
197 representing the original EMG ( $EMG_o$ ), where  $m$  is the number of muscles (i.e.  $m = 8$ ) and  $t$  is the  
198 number of data points (i.e.  $t = 201 \times$  the number of gait cycles available). The NMFs were  
199 performed using the Statistics and Machine Learning Toolbox in Matlab R2017a (The MathWorks  
200 Inc.; Natick, MA) which populated an  $n \times t$  matrix (Pattern Matrix) and an  $m \times n$  matrix (Weighting  
201 Matrix), where  $n$  is the number of modules. The Pattern Matrix represents the temporal waveform  
202 of each module while the Weighting Matrix represents the weight of each muscle within each of  
203 the modules, such that the product of these matrices ( $EMG_r$ ) reconstructs the original EMG (Fig.  
204 1). The sum of the squared errors between  $EMG_r$  and  $EMG_o$  was quantified with the percent of  
205 variability accounted for (VAF). The VAF was calculated for each muscle (mVAF) of each  
206 solution using:

$$207 \quad mVAF = \left( 1 - \frac{(EMG_{m,o} - EMG_{m,r})^2}{EMG_{m,o}^2} \right) \times 100\% \quad \text{Equation 1}$$

208 and the total VAF (tVAF) for each solution was calculated using:

$$209 \quad tVAF = \left( 1 - \frac{\sum_{m=1}^8 (EMG_{m,o} - EMG_{m,r})^2}{\sum_{m=1}^8 EMG_{m,o}^2} \right) \times 100\% \quad \text{Equation 2}$$

210

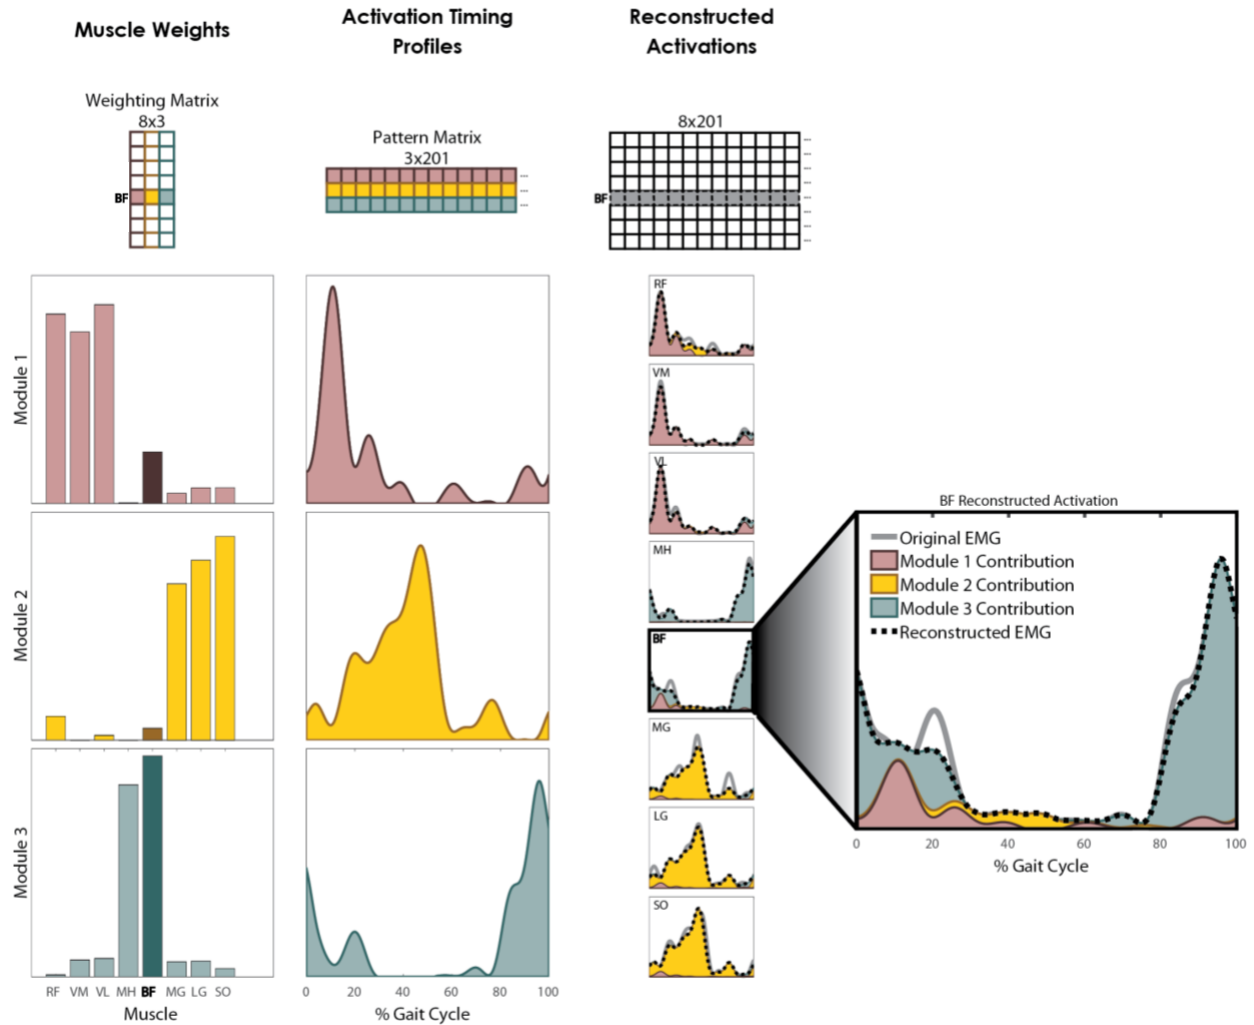

211  
 212 **Figure 1.** Muscle modules were calculated using non-negative matrix factorization (NMF) in  
 213 which an  $m \times n$  Weighting Matrix is multiplied by an  $n \times t$  Pattern Matrix to reconstruct the EMG  
 214 patterns in an  $m \times t$  matrix, where  $m$  is the number of muscles (8 in this study),  $n$  is the number of  
 215 modules (3 in this example), and  $t$  is the number of data points in the trial (201 in this study). The  
 216 Pattern Matrix represents the timing profile of each module. The Weighting Matrix represents  
 217 how strongly each muscle is represented in the module. This process is iterated, increasing  $n$   
 218 from 1 to  $m$  until the error between the reconstructed EMG (black dotted line) and the original  
 219 EMG (solid gray line) is reduced to some acceptable level determined by the variability  
 220 accounted for (VAF) criteria.

221  
 222  
 223 In order to find the number of modules required to reconstruct EMG<sub>o</sub>, the number of  
 224 modules was increased from 1 to  $m$  (i.e.,  $m = 8$ ; the number of muscles recorded) in separate NMFs  
 225 with a maximum of 10,000 iterations until one of the two following criteria were satisfied: (a) the  
 226 lower bound of the 95% confidence interval (CI) of tVAF was greater than 90% for all muscles

227 and the minimum lower bound of the 95% CI of all mVAFs was greater than 75%, or (b) the  
228 minimum lower bound of the 95% CI for all mVAFs was greater than 75% and the addition of  
229 another module did not raise the lower bound of the 95% CI for that mVAF by more than 5% of  
230 its value in the previous NMF (Clark et al. 2010). The 95% CIs of the VAFs were found using a  
231 bootstrapping technique adopted from Allen et al. (2017), wherein  $EMG_o$  was resampled 500 times  
232 with replacement. The 95% CI was assembled from the VAFs of all 500 bootstrapped gait cycles.  
233 Once the appropriate number of modules was determined, we ran a final NMF on the original  
234 EMG using a multiplicative update algorithm with 50 replicates. To allow for comparison of  
235 modules between participants and timepoints, the Weighting Matrix was normalized to the  
236 maximum muscle weight within that module. Additionally, we evaluated tVAF for all possible  
237 module solutions (i.e. 1 module, 2 modules, ..., 8 modules) as a measure of the complexity of the  
238 control strategy. A higher tVAF value for any given module solution represents a better fit between  
239 the reconstructed and original EMGs. Therefore, a low tVAF value indicates that the solution is  
240 not capable of fully capturing the complexity of the actual control strategy.

241 To characterize modular organization, we adapted definitions of  $W_{musc}$  and  $W_{sum}$  from  
242 Hayes et al. (2014). The number of significantly active muscles in each module was defined as  
243  $W_{musc}$ , and the sum of the weights of the significantly active muscles in each module was defined  
244 as  $W_{sum}$ . In Hayes et al. (2014) a muscle was considered significantly active if the 95% CI of  
245 weights for the 500 bootstrapped gait cycles did not contain 0. However, participants in the current  
246 study often had confidence intervals with a lower bound greater than zero but a very small upper  
247 bound. Under the original definition from Hayes et al. (2014), all modules for all participants in  
248 the TKA cohort had a  $W_{musc}$  of 7 or 8, meaning all muscles were significantly active in all modules.  
249 To uncover more subtle differences in  $W_{musc}$  and  $W_{sum}$  between participants in our cohort, we

250 adapted the definition of “significantly active,” such that a muscle was considered significantly  
251 active if the 95% CI of weights did not contain 0 and the upper bound was greater than 0.25.  
252 Modules from each of the 500 samples were sorted using a k-means algorithm to ensure like-  
253 modules were grouped prior to determining the 95% CIs for the weights (Roelker et al. 2021).

254

### 255 *Healthy Control Group*

256 Motor modules from 10 older adults with no known lower extremity osteoarthritis, a subset  
257 of the cohort used in Roelker et al. (2021), were used as healthy, age-matched controls to compare  
258 to the KOA and TKA data. The processes for data collection and identification of muscle modules  
259 are consistent with this study, with the exception of the bandpass filter used to process the EMG  
260 data. Roelker et al. (2021) used a 30-300 Hz bandpass filter while we used a 50-300 Hz bandpass  
261 filter in the current study due to the previously mentioned high BMI and resulting motion artifact  
262 observed in the TKA cohort. We determined  $W_{\text{musc}}$  and  $W_{\text{sum}}$  for each module for each healthy  
263 participant based on our new definition for “significantly active” muscles.

264

### 265 *Comparison of Module Organization*

266 To determine similarities in module organization between populations, we compared the  
267 module weightings of the study participants to those of the healthy controls. The muscle weights  
268 of each module for each participant at each timepoint were compared to the averaged weights of  
269 healthy age-matched controls with the same number of modules using Pearson correlations. A  
270 critical correlation coefficient of  $\rho \geq 0.834$  was selected based on the number of muscles (8) and  
271 a  $p$ -value of 0.01 (Allen et al. 2017; Allen, Kesar, and Ting 2019; Hayes et al. 2014). A module  
272 was considered to have proper organization if its weights were correlated with the healthy group

273 and its  $W_{\text{musc}}$  and  $W_{\text{sum}}$  values were within the 95% CIs of the healthy group. Participants were  
274 considered to have proper organization if all of their modules were organized like healthy controls  
275 and poor organization if at least one module did not have healthy organization.

276

### 277 *Minimum Detectable Changes in Functional Performance*

278 Differences in performance-based and self-reported measures were evaluated based on  
279 minimum detectable changes (MDCs), defined by previously reported 90% CIs from  
280 representative populations. Improvements were indicated by decreases in the time to complete  
281 SCT ( $\geq 1.9$  seconds; (Almeida et al. 2010)) and TUG ( $\geq 2.49$  seconds; (Kennedy et al. 2005)),  
282 increases in the distance walked during 6MW ( $\geq 61.34$  meters; (Kennedy et al. 2005)), and  
283 increases in all KOOS subscales ( $\geq 10$  points; (Roos and Lohmander 2003)).

284

### 285 *Statistics*

286 To address our hypotheses, we investigated the relationship between functional  
287 performance measures and the number (Hypothesis I) and organization (Hypothesis II) of modules.  
288 At each time point, separate generalized linear mixed models (GLMM) for repeated measures  
289 determined the effects of number of modules and module organization (proper or poor) on all  
290 functional measures, with testing time point as a covariate. GLMMs allowed us to include all  
291 participants regardless of whether each had useable data at 1, 2, or all 3 testing time points.

292 We also examined differences in demographics, function, and modules between testing  
293 time points and populations. Separate unpaired t-tests compared demographics data between the  
294 healthy control group and the group tested at 24-months post-TKA. Separate GLMMs compared  
295 demographics data (height, mass, BMI, self-selected walking speed, stride length normalized to

296 leg length), performance-based function (SCT, TUG, 6MW), KOOS-subscale scores (Pain,  
297 Symptoms, ADL, QOL), number of modules, and module organization (proper or poor) between  
298 participants grouped by time point. As an additional examination of module complexity, we used  
299 GLMMs to determine differences in tVAF for all possible module solutions (i.e. 1 to 8 modules)  
300 between time points.

301 A significance level of  $\alpha < 0.05$  was established *a priori* for all tests, and all statistical  
302 analyses were performed using Statistical Analysis Software (SAS Institute Inc.; Cary, NC).

303

## 304 **RESULTS**

### 305 *Population Demographics and Modules*

306 The comparisons of the demographics data between the participants in the TKA group at  
307 each time point revealed statistically significant differences in BMI ( $p = 0.043$ ), and self-selected  
308 walking speed ( $p = 0.001$ ; Table 1). The group tested before surgery walked slower than the groups  
309 at 6- and 24-months after surgery. The group tested at 24-months after surgery had higher BMI  
310 than those tested before or 6-months after surgery. There were no significant differences in age,  
311 height, self-selected walking speed, or normalized stride length between the TKA and healthy  
312 cohorts, but the TKA group had significantly higher mass ( $p = 0.001$ ) and BMI ( $p < 0.0001$ ) than  
313 the healthy group (Table 1).

314 Of the 10 healthy individuals, 3 demonstrated 2 modules and 7 demonstrated 3 modules  
315 ( $2.7 \pm 0.5$  modules; Table 1). Those with 2 modules had 1 module dominated by the plantarflexors  
316 and 1 module dominated by the quadriceps and hamstrings. Those with 3 modules had modules  
317 dominated by the plantarflexors, quadriceps, and hamstrings, separately. Before surgery, 16  
318 individuals with TKA demonstrated 2 modules and 14 demonstrated 3 modules, and 6 of the 30

319 (20.0%) participants had proper organization. By 6-months after surgery, 12 demonstrated 2  
 320 modules and 14 demonstrated 3 modules, and 11 of the 26 (42.3%) participants had proper module  
 321 organization. By 24-months after surgery, 5 participants demonstrated 2 modules and 8  
 322 demonstrated 3 modules, and 6 of the 13 (46.2%) participants had proper organization. There was  
 323 no difference in number of modules ( $p = 0.844$ ) or module organization ( $p = 0.143$ ) between time  
 324 points (Table 1).

325

326 **Table 1.** Average demographics, module metrics, and function metrics grouped by time point and  
 327 population ( $\pm 1$  standard deviation). The healthy control group was compared to the group of  
 328 participants tested at 24-months post-TKA. M = male; F = female; \* indicates a clinically  
 329 meaningful improvement in function compared to the previous time point.

330

|                  | Patient Population; n = 38     |                                |                                 |                      | Healthy Controls<br>n = 10     | p-Value <sup>‡</sup> |                   |
|------------------|--------------------------------|--------------------------------|---------------------------------|----------------------|--------------------------------|----------------------|-------------------|
|                  | Pre-TKA<br>n = 30              | 6-months<br>Post-TKA<br>n = 26 | 24-months<br>Post-TKA<br>n = 13 | p-Value <sup>†</sup> |                                |                      |                   |
| Demographics     | Sex                            | 13M, 17F                       | 9M, 17F                         | 5M, 8F               | -                              | 5M, 5F               | -                 |
|                  | Height (m)                     | 1.70 $\pm$ 0.10                | 1.67 $\pm$ 0.10                 | 1.69 $\pm$ 0.11      | 0.611                          | 1.69 $\pm$ 0.08      | 0.902             |
|                  | Age (y)                        | 59.7 $\pm$ 7.8                 | 60.3 $\pm$ 7.0                  | 61.9 $\pm$ 6.9       | -                              | 63.5 $\pm$ 3.4       | 0.194             |
|                  | Mass (kg)                      | 96.3 $\pm$ 18.7                | 96.8 $\pm$ 20.3                 | 100.5 $\pm$ 20.4     | 0.124                          | 71.5 $\pm$ 13.5      | <b>0.001</b>      |
|                  | BMI (kg/m <sup>2</sup> )       | 33.7 $\pm$ 5.1                 | 34.0 $\pm$ 5.7                  | 35.5 $\pm$ 6.4       | <b>0.043<sup>bc</sup></b>      | 24.8 $\pm$ 2.6       | <b>&lt;0.0001</b> |
|                  | Walking Speed (m/s)            | 0.97 $\pm$ 0.26                | 1.11 $\pm$ 0.22                 | 1.22 $\pm$ 0.13      | <b>0.001<sup>ab</sup></b>      | 1.12 $\pm$ 0.18      | 0.168             |
|                  | Normalized Stride Length (m/m) | 1.42 $\pm$ 0.25                | 1.53 $\pm$ 0.24                 | 1.57 $\pm$ 0.22      | 0.056                          | 1.51 $\pm$ 0.16      | 0.231             |
| Mods             | Number of Modules              | 2.5 $\pm$ 0.6                  | 2.5 $\pm$ 0.6                   | 2.5 $\pm$ 0.5        | 0.844                          | 2.7 $\pm$ 0.5        | 0.688             |
|                  | Proper Module Organization     | 6 of 30                        | 11 of 26                        | 6 of 13              | 0.143                          | -                    | -                 |
| Function Metrics | SCT (s)                        | 25.7 $\pm$ 14.6                | 19.5 $\pm$ 8.8*                 | 18.3 $\pm$ 6.8       | <b>0.049<sup>ab</sup></b>      | -                    | -                 |
|                  | TUG (s)                        | 11.5 $\pm$ 4.4                 | 10.0 $\pm$ 1.9                  | 8.8 $\pm$ 1.8        | <b>0.016<sup>ab</sup></b>      | -                    | -                 |
|                  | 6MW (m)                        | 401.1 $\pm$ 106.9              | 457.9 $\pm$ 89.0                | 495.5 $\pm$ 78.2     | <b>0.001<sup>abc</sup></b>     | -                    | -                 |
|                  | KOOS-Pain (pts)                | 48.7 $\pm$ 20.4                | 73.7 $\pm$ 22.2*                | 79.6 $\pm$ 15.5      | <b>&lt;0.0001<sup>ab</sup></b> | -                    | -                 |
|                  | KOOS-Symptoms (pts)            | 46.4 $\pm$ 21.2                | 63.6 $\pm$ 18.7*                | 72.3 $\pm$ 15.9      | <b>0.006<sup>ab</sup></b>      | -                    | -                 |
|                  | KOOS-ADL (pts)                 | 55.8 $\pm$ 20.8                | 78.2 $\pm$ 21.4*                | 80.2 $\pm$ 14.1      | <b>&lt;0.0001<sup>ab</sup></b> | -                    | -                 |
|                  | KOOS-QOL (pts)                 | 24.7 $\pm$ 21.0                | 54.3 $\pm$ 22.2*                | 64.1 $\pm$ 24.2      | <b>&lt;0.0001<sup>ab</sup></b> | -                    | -                 |

Tested using separate generalized linear mixed models<sup>†</sup> or unpaired t-tests<sup>‡</sup>

Symbols indicate differences between: <sup>a</sup> Pre-TKA and 6-months Post-TKA,

<sup>b</sup> Pre-TKA and 24-months Post-TKA, <sup>c</sup> 6- and 24- months Post-TKA

331  
332

333 There were differences in mean tVAF values between time points for solutions with 1, 2,  
334 6 and 7 modules (Fig. 2). For the 1-module solution, the group tested before surgery ( $79.8 \pm 6.3\%$ )  
335 had a statistically higher mean tVAF value than those at 6-months ( $75.7 \pm 6.3\%$ ;  $p = 0.001$ ) and  
336 24-months ( $72.9 \pm 8.2\%$ ;  $p = 0.003$ ) after surgery. For the 2-module solution, the group tested  
337 before surgery ( $91.2 \pm 2.6\%$ ) had a statistically higher mean tVAF than those at 24-months after  
338 surgery ( $89.3 \pm 2.7\%$ ;  $p = 0.033$ ). For the 6-module solution, the group tested before surgery ( $99.3$   
339  $\pm 0.3\%$ ) had a statistically higher mean tVAF than those at 24-months after surgery ( $99.1 \pm 0.3\%$ ;  
340  $p = 0.016$ ). For the 7-module solution, the group tested before surgery ( $99.7 \pm 0.1\%$ ) had a  
341 statistically higher mean tVAF than those at 6-months ( $99.7 \pm 0.1\%$ ;  $p = 0.040$ ) and 24-months  
342 ( $99.6 \pm 0.2\%$ ;  $p = 0.004$ ) after surgery.

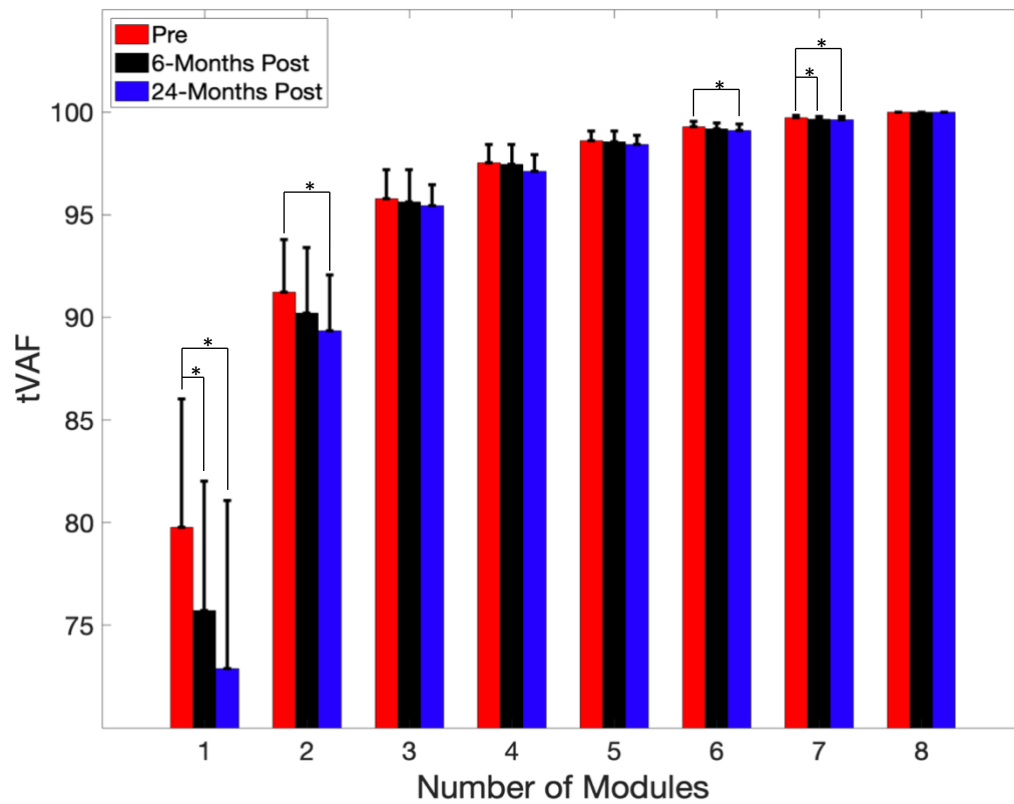

343 **Figure 2.** Estimated mean tVAF by time point for number of modules varying from 1 to 8. Error  
344 bars represent +1 standard deviation. \* indicates statistically significant differences between time  
345 points.  
346



347           The worst averaged functional scores were observed before surgery and the best averaged  
348 functional scores were observed 24-months after surgery (Table 1). All measures had statistically  
349 significantly improvements from before to 6-months after surgery (all  $p \leq 0.049$ ), and these  
350 improvements were also clinically meaningful for the SCT and all KOOS subscales. Average  
351 6MW distance also had a statistically significantly improvement from 6- to 24-months after  
352 surgery, but this improvement was not clinically meaningful.

353

#### 354 *Hypothesis I: Function and Number of Modules*

355           A higher number of modules was associated with better performance in a few performance-  
356 based and patient-reported functional measures before and 6-months after surgery but with poorer  
357 performance in a few functional measures 24-months after surgery (Fig. 3). Before surgery,  
358 participants with 3 modules demonstrated better scores on average than those with 2 modules in  
359 all measures, and this difference was clinically meaningful in all measures except the 6MW  
360 distance (Table 2). These results were statistically significant for the TUG ( $p = 0.002$ ) and KOOS-  
361 Pain ( $p = 0.005$ ) scores and approached significance for the SCT ( $p = 0.060$ ), KOOS-ADL ( $p =$   
362  $0.057$ ), and KOOS-QOL ( $p = 0.065$ ) scores. By 6-months after surgery, participants with 3  
363 modules demonstrated better scores on average than those with 2 modules in all measures except  
364 the KOOS-QOL subscale (Table 2). These differences were clinically meaningful for only the  
365 SCT, which also approached statistical significance ( $p = 0.052$ ) and were statistically significant,  
366 but not clinically meaningful for the TUG test ( $p = 0.028$ ). By 24-months after surgery, participants  
367 with 2 modules had better scores on average than those with 3 modules in SCT, 6MW, KOOS-  
368 Symptoms scores (Table 2). These differences were clinically meaningful for the SCT and for the  
369 6MW, which was also statistically significant ( $p = 0.006$ ).

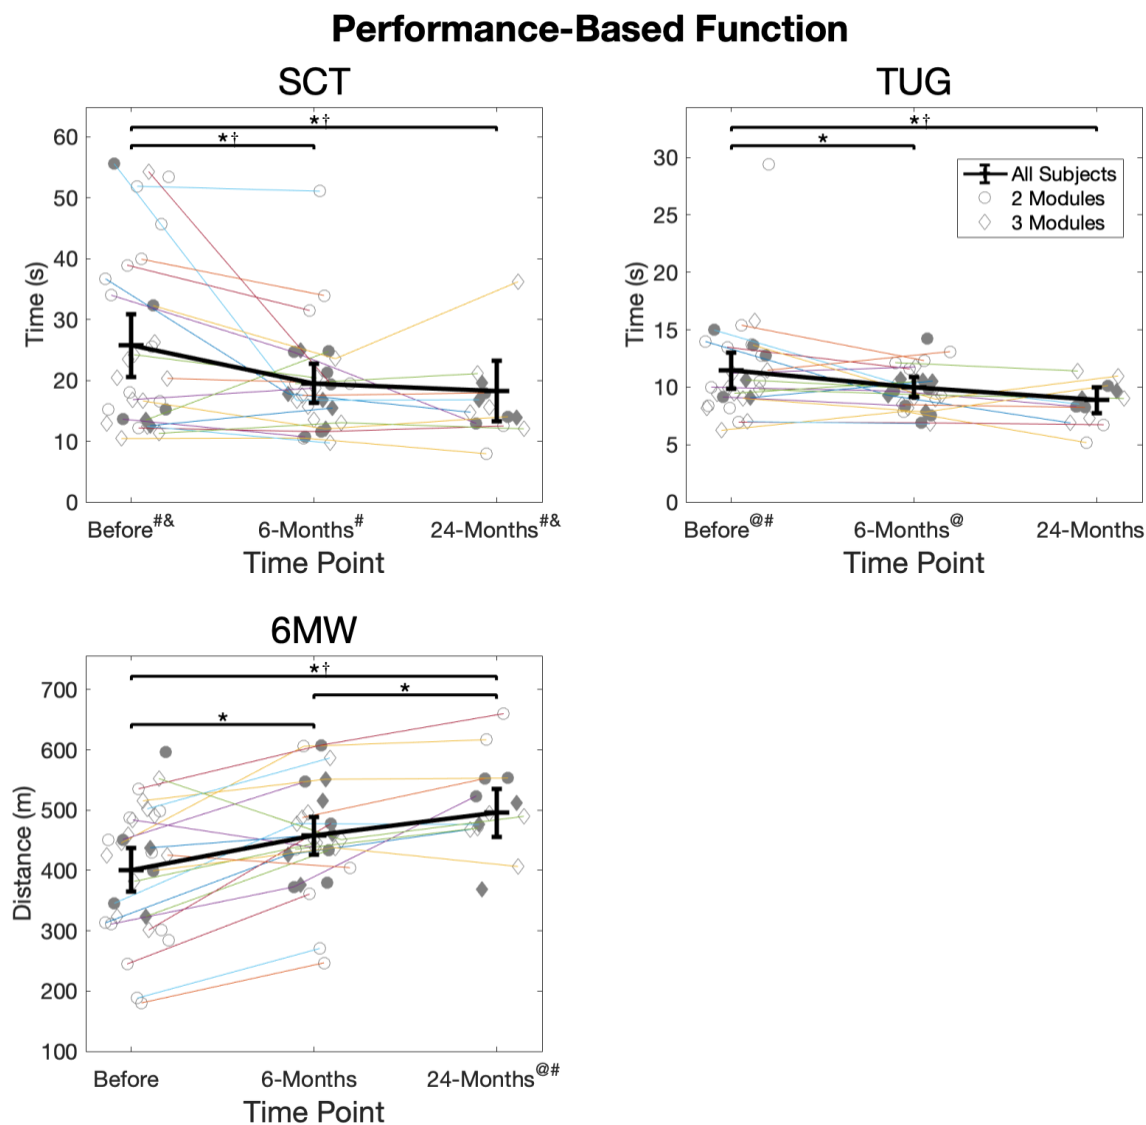

370  
371  
372 **Figure 3.** Performance-based functional scores for each participant at each time point.  
373 Participants who were present for consecutive testing time points are connected. Filled symbols  
374 indicate participants with proper module organization. Thick black lines indicate the group  
375 estimated means and 95% confidence intervals at each time point, determined by the GLMM.  
376 \*/† = statistically significant (\*) and clinically meaningful (†) differences in function between  
377 time points.  
378 @/# = statistically significant (@) and clinically meaningful (#) differences in function between  
379 groups demonstrating the same number of modules at each time point.  
380 & = clinically meaningful differences in function between groups demonstrating proper or poor  
381 module organization at each time point. There were no statistically significant differences.

382 **Table 2.** Average outcome scores within groups of participants demonstrating the same number  
 383 of modules at each timepoint (estimated mean  $\pm$  1 standard deviation). † indicates a clinically  
 384 meaningful difference in function between the Two Modules and Three Modules groups.  
 385

|                       |                    | Two Modules       | Three Modules    | p-Value                  |
|-----------------------|--------------------|-------------------|------------------|--------------------------|
| Number of Subjects    | Pre-TKA            | n = 16            | n = 14           | -                        |
|                       | 6-months Post-TKA  | n = 12            | n = 14           | -                        |
|                       | 24-months Post-TKA | n = 5             | n = 8            | -                        |
| SCT (s)               | Pre-TKA            | 30.2 $\pm$ 15.3   | 21.0 $\pm$ 11.2  | 0.060 <sup>†</sup>       |
|                       | 6-months Post-TKA  | 22.5 $\pm$ 11.5   | 16.4 $\pm$ 4.2   | 0.052 <sup>†</sup>       |
|                       | 24-months Post-TKA | 16.1 $\pm$ 3.6    | 19.5 $\pm$ 7.6   | 0.434 <sup>†</sup>       |
| TUG (s)               | Pre-TKA            | 13.1 $\pm$ 5.3    | 9.6 $\pm$ 2.3    | <b>0.002<sup>†</sup></b> |
|                       | 6-months Post-TKA  | 10.8 $\pm$ 2.5    | 9.4 $\pm$ 1.4    | <b>0.028</b>             |
|                       | 24-months Post-TKA | 9.2 $\pm$ 1.9     | 8.9 $\pm$ 1.6    | 0.803                    |
| 6MW (m)               | Pre-TKA            | 379.7 $\pm$ 123.8 | 425.9 $\pm$ 76.8 | 0.138                    |
|                       | 6-months Post-TKA  | 453.8 $\pm$ 116.3 | 467.9 $\pm$ 53.7 | 0.591                    |
|                       | 24-months Post-TKA | 546.1 $\pm$ 55.7  | 468.4 $\pm$ 48.4 | <b>0.006<sup>†</sup></b> |
| KOOS-Pain (points)    | Pre-TKA            | 39.2 $\pm$ 16.6   | 58.8 $\pm$ 19.8  | <b>0.005<sup>†</sup></b> |
|                       | 6-months Post-TKA  | 69.8 $\pm$ 24.6   | 78.3 $\pm$ 12.4  | 0.186                    |
|                       | 24-months Post-TKA | 80.6 $\pm$ 13.5   | 80.7 $\pm$ 17.0  | 0.987                    |
| KOOS-Symptom (points) | Pre-TKA            | 40.3 $\pm$ 18.8   | 52.4 $\pm$ 22.5  | 0.152 <sup>†</sup>       |
|                       | 6-months Post-TKA  | 60.5 $\pm$ 19.8   | 67.1 $\pm$ 17.3  | 0.393                    |
|                       | 24-months Post-TKA | 79.0 $\pm$ 13.8   | 69.2 $\pm$ 16.5  | 0.418                    |
| KOOS-ADL (points)     | Pre-TKA            | 49.1 $\pm$ 17.9   | 63.0 $\pm$ 22.3  | 0.057 <sup>†</sup>       |
|                       | 6-months Post-TKA  | 76.4 $\pm$ 25.6   | 80.0 $\pm$ 9.5   | 0.482                    |
|                       | 24-months Post-TKA | 77.8 $\pm$ 12.0   | 83.2 $\pm$ 15.9  | 0.520                    |
| KOOS-QOL (points)     | Pre-TKA            | 17.7 $\pm$ 15.0   | 32.3 $\pm$ 24.1  | 0.065 <sup>†</sup>       |
|                       | 6-months Post-TKA  | 57.2 $\pm$ 20.0   | 53.1 $\pm$ 20.1  | 0.515                    |
|                       | 24-months Post-TKA | 61.7 $\pm$ 28.4   | 64.8 $\pm$ 22.5  | 0.832                    |

386 Tested using GLMM with interaction between timepoint and number of modules.

387 *Hypothesis II: Function and Module Organization*

388           Better module organization was not statistically associated with better performance-based  
389 function (SCT, TUG, or 6MW) or patient-reported function (KOOS subscales) before or after  
390 surgery (Fig. 4). However, the largest differences in function between the proper and poor  
391 organization groups occurred 24-months after surgery, with the proper organization group  
392 demonstrating better function on average in all performance-based and patient-reported measures  
393 (Table 3). These results approached statistical significance for the KOOS-Pain subscale ( $p = 0.061$ )  
394 and were clinically meaningful for the SCT, KOOS-Pain, and KOOS-Symptoms scores.

395

396 *Secondary Analysis: Changes in Modules*

397           While there were no significant differences in modules between participants grouped by  
398 time point, we observed changes in module number and organization in individual participants  
399 throughout the time course of recovery (Table 4). From before to 6-months after surgery, 63.2%  
400 of participants present at both time points demonstrated changes in module number and/or  
401 organization. From 6- to 24-months after surgery, 80% of participants present at both time points  
402 demonstrated changes in module number and/or organization. From before to 24-months after  
403 surgery, 100% of participants present at both time points demonstrated changes in module number  
404 and/or the organization of at least 1 module (Table 4).

405

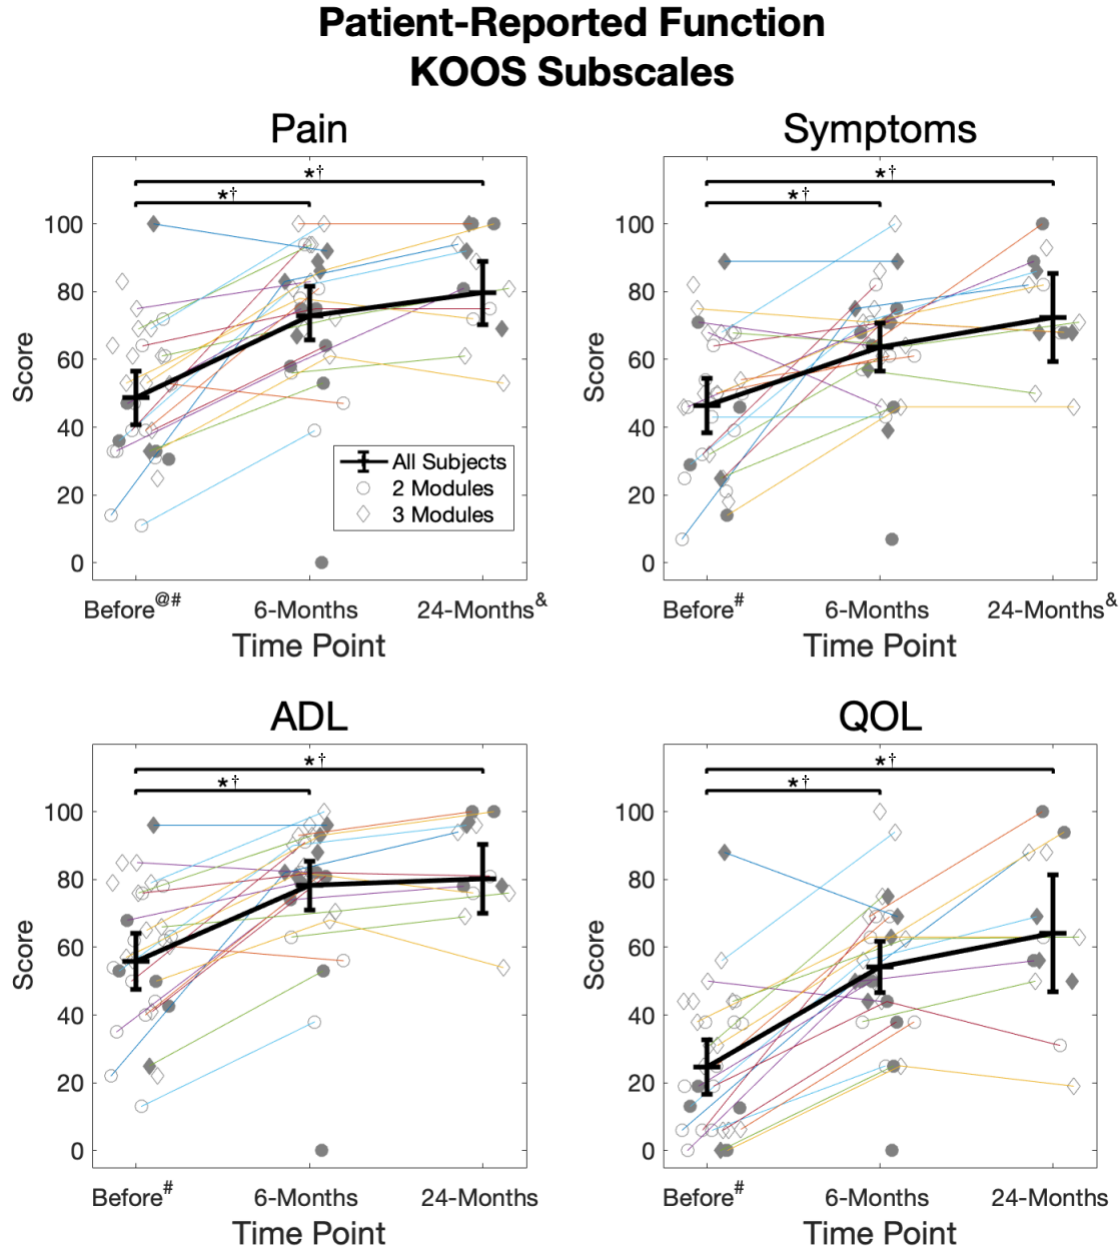

406  
407  
408  
409  
410  
411  
412  
413  
414  
415  
416  
417  
418

**Figure 4.** Performance-based functional scores for each participant at each time point. Participants who were present for consecutive testing time points are connected. Filled symbols indicate participants with proper module organization. Thick black lines indicate the group estimated means and 95% confidence intervals at each time point, determined by the GLMM. \*/† = statistically significant (\*) and clinically meaningful (†) differences in function between time points. @/# = statistically significant (@) and clinically meaningful (#) differences in function between groups demonstrating the same number of modules at each time point. & = clinically meaningful differences in function between groups demonstrating proper or poor module organization at each time point. There were no statistically significant differences.

419 **Table 3.** Average outcome scores within groups of participants with modules that were (Proper)  
 420 or were not (Poor) organized like healthy controls at each timepoint (estimated mean  $\pm$  1 standard  
 421 deviation). † indicates a clinically meaningful difference in function between the Proper and Poor  
 422 organization groups.  
 423

|                       |                    | Poor              | Proper           | p-Value            |
|-----------------------|--------------------|-------------------|------------------|--------------------|
| Number of Subjects    | Pre-TKA            | n = 24            | n = 6            | -                  |
|                       | 6-months Post-TKA  | n = 15            | n = 11           | -                  |
|                       | 24-months Post-TKA | n = 7             | n = 6            | -                  |
| SCT (s)               | Pre-TKA            | 26.1 $\pm$ 14.2   | 24.2 $\pm$ 17.3  | 0.750 <sup>†</sup> |
|                       | 6-months Post-TKA  | 19.9 $\pm$ 10.7   | 19.1 $\pm$ 5.4   | 0.824              |
|                       | 24-months Post-TKA | 19.6 $\pm$ 9.3    | 16.2 $\pm$ 2.6   | 0.487 <sup>†</sup> |
| TUG (s)               | Pre-TKA            | 11.3 $\pm$ 4.8    | 12.0 $\pm$ 2.5   | 0.695              |
|                       | 6-months Post-TKA  | 10.2 $\pm$ 1.9    | 9.8 $\pm$ 2.0    | 0.679              |
|                       | 24-months Post-TKA | 8.5 $\pm$ 2.3     | 9.2 $\pm$ 0.8    | 0.540              |
| 6MW (m)               | Pre-TKA            | 401.6 $\pm$ 110.3 | 399.9 $\pm$ 97.4 | 0.963              |
|                       | 6-months Post-TKA  | 454.4 $\pm$ 96.2  | 462.2 $\pm$ 79.6 | 0.762              |
|                       | 24-months Post-TKA | 489.3 $\pm$ 89.8  | 502.0 $\pm$ 69.3 | 0.727              |
| KOOS-Pain (points)    | Pre-TKA            | 49.5 $\pm$ 19.2   | 46.4 $\pm$ 26.8  | 0.729              |
|                       | 6-months Post-TKA  | 77.3 $\pm$ 19.1   | 68.1 $\pm$ 25.7  | 0.116              |
|                       | 24-months Post-TKA | 75.2 $\pm$ 14.6   | 86.1 $\pm$ 12.8  | 0.061 <sup>†</sup> |
| KOOS-Symptom (points) | Pre-TKA            | 46.8 $\pm$ 19.6   | 45.7 $\pm$ 29.1  | 0.920              |
|                       | 6-months Post-TKA  | 63.4 $\pm$ 15.7   | 63.4 $\pm$ 22.5  | 0.999              |
|                       | 24-months Post-TKA | 67.3 $\pm$ 17.3   | 79.1 $\pm$ 13.8  | 0.315 <sup>†</sup> |
| KOOS-ADL (points)     | Pre-TKA            | 56.1 $\pm$ 20.4   | 55.9 $\pm$ 24.2  | 0.984              |
|                       | 6-months Post-TKA  | 79.2 $\pm$ 17.1   | 76.6 $\pm$ 26.8  | 0.641              |
|                       | 24-months Post-TKA | 78.7 $\pm$ 14.5   | 83.9 $\pm$ 10.6  | 0.478              |
| KOOS-QOL (points)     | Pre-TKA            | 24.4 $\pm$ 17.7   | 27.5 $\pm$ 33.2  | 0.756              |
|                       | 6-months Post-TKA  | 56.8 $\pm$ 22.4   | 50.5 $\pm$ 20.8  | 0.355              |
|                       | 24-months Post-TKA | 63.2 $\pm$ 26.3   | 67.7 $\pm$ 21.3  | 0.759              |

424 Tested using GLMM with interaction between timepoint and organization.

425 **Table 4.** Number of participants (%) that were present at multiple time points and demonstrated  
 426 changes in module characteristics. Proper organization describes participants whose organization  
 427 matched those of healthy controls for all modules. Poor organization describes participants with  
 428 at least 1 module that was not organized like healthy controls. Participants who are listed as  
 429 having a change in “Any Module Characteristic” had a change in the number of modules and/or  
 430 the organization of at least 1 module compared to healthy controls.  
 431

|                                 |           | Pre-TKA to<br>6-m Post-TKA<br>n = 19 | 6-m to 24-m<br>Post-TKA<br>n = 10 | Pre-TKA to<br>24-m Post-TKA<br>n = 10 |
|---------------------------------|-----------|--------------------------------------|-----------------------------------|---------------------------------------|
| Number of<br>Modules            | Increase  | 3 (15.8%)                            | 1 (10%)                           | 4 (40%)                               |
|                                 | No Change | 12 (63.2%)                           | 7 (70%)                           | 4 (40%)                               |
|                                 | Decrease  | 4 (21.1%)                            | 2 (20%)                           | 2 (20%)                               |
| Proper vs. Poor<br>Organization | Improved  | 5 (26.3%)                            | 2 (20%)                           | 4 (40%)                               |
|                                 | No Change | 12 (63.2%)                           | 6 (60%)                           | 5 (50%)                               |
|                                 | Worsened  | 2 (10.5%)                            | 2 (20%)                           | 1 (10%)                               |
| Any Module<br>Characteristic    | Change    | 12 (63.2%)                           | 8 (80%)                           | 10 (100%)                             |
|                                 | No Change | 7 (36.8%)                            | 2 (20%)                           | 0 (0%)                                |

432  
 433  
 434  
 435  
 436  
 437

## DISCUSSION

438 The purpose of this study was to determine the relationship between modular control  
 439 strategy and function in individuals before and at multiple time points after TKA. Our findings  
 440 partially confirmed our first hypothesis that better function would be related to a higher number of  
 441 modules. We found that participants with better performance-based function before and 6-months  
 442 after surgery and better patient-reported function before surgery had a higher number of modules.  
 443 However, at 24-months after surgery, a higher number of modules were related to worse 6MW  
 444 performance, which contradicts our first hypothesis. Our findings did not strongly confirm our  
 445 second hypothesis that better function would be related to module organization that more closely  
 446 resembled that of healthy controls. However, by 24-months after surgery, participants with proper  
 447 module organization had better function on average than those with poor organization in all

448 performance-based and patient-reported measures, with some differences being clinically  
449 meaningful. Considerable participant drop-out by the 24-month time point may have prevented us  
450 from detecting statistically significant differences in function between groups demonstrating  
451 proper and poor module organization. While we did not find differences in population averaged  
452 modular control between timepoints, we did observe changes in both module number and  
453 organization in individuals and in population-mean complexity, as measured by tVAF. While the  
454 differences in tVAF between testing time points were statistically significant for the 6- and 7-  
455 module solutions, they were likely not clinically meaningful, though a clinically meaningful  
456 difference in tVAF values has not been established in the literature. Larger differences in tVAF  
457 between time points were observed for the 1- and 2-module solutions, which may indicate that  
458 module complexity is malleable in this population. Together with our observations on module  
459 organization, these results indicate that motor modules are plastic and suggest that neural control  
460 strategy is influenced by surgical intervention and rehabilitation in this population.

461         The association we observed between number of modules and function partially confirms  
462 the findings of Ardestani et al. (2017), who found that a higher number of modules was associated  
463 with better patient-reported function 1-year following TKA. While we found that better function  
464 was associated with a higher number of modules in individuals with KOA prior to TKA, we did  
465 not find this association by 24-months after surgery. Several methodological differences exist  
466 between the current study and Ardestani et al. (2017) which may explain the differences in results.  
467 Ardestani et al. (2017) measured patient-reported function using the Knee Functional Survey  
468 (KFS) (Weiss et al. 2002), which assesses general patient satisfaction and symptoms, ability to  
469 complete activities of daily living, and ability to participate in sports and exercise. The KFS may  
470 most closely relate to the KOOS-Symptoms, KOOS-ADL, and KOOS-QOL subscales, which were



471 not statistically related to number of modules in the current study. However, our small sample  
472 sizes, particularly by 24-months after surgery, may have prevented us from detecting associations  
473 between patient-reported function and number of modules after surgery. Additionally, the methods  
474 for module extraction used by Ardestani et al. (2017), including a strict error criterion of 90%  
475 accuracy between the experimental and reconstructed EMG, resulted in a range of 2-5 modules,  
476 whereas we saw only 2-3 modules. We believe our approach for calculating modules using 500  
477 bootstrapped samples (Sawers, Allen, and Ting 2015) and a previously developed, conservative  
478 VAF criteria (Clark et al. 2010) is robust. Lastly, participants in Ardestani et al. (2017) received  
479 cruciate-retaining implants while participants in the current study received posterior-stabilizing  
480 implants. The comparison of our results with those of Ardestani et al. (2017) may suggest that  
481 proprioceptive inputs, which are lost as a result of sacrificing the cruciate ligaments, influence  
482 neuromuscular control strategy. However, the lack of consistency in methodologies across studies  
483 warrants further investigation into the influence of retaining the posterior cruciate ligament on  
484 post-surgical neuromuscular control. Further, while Ardestani et al. (2017) indicated an association  
485 between a higher number of modules and better patient-reported function at 1-year following TKA,  
486 our results indicate that the relationship between number of modules and function changes over  
487 the time course of recovery.

488         The observed relationship between a higher number of modules and better function in some  
489 measures before TKA reversed in some measures by 24-months after TKA. The group with 2  
490 modules 24-months after surgery demonstrated 6MW distances that were on average better,  
491 statistically and clinically, than those with 3 modules. Further analysis revealed that there were 2  
492 participants with 2 modules that had significantly higher 6MW distances than the other participants  
493 at this time point which drove this result. Both participants demonstrated module organization that

494 was different from the healthy controls, with one module that was dominated by the quadriceps  
495 and hamstrings and one module that was dominated by the plantarflexors and hamstrings such that  
496 the hamstrings were constantly active throughout the gait cycle. These participants also  
497 demonstrated better-than-average SCT and TUG performance at 24-months but had unremarkable  
498 KOOS scores and demographics measures. When examining all participants at 24-months post-  
499 TKA, we found that 3 of the 5 participants (60%) with 2 modules had proper organization while  
500 only 3 of the 8 participants (37.5%) with 3 modules had proper organization. These results indicate  
501 that module organization, rather than number, may be a factor which is related to function in the  
502 long-term post-operative time frame (24-months after TKA).

503         Though there were no statistically significant differences in function between the proper  
504 and poor organization groups at any time point, we observed trends toward better function in all  
505 functional measures, except TUG, for the group with proper module organization at 24-months  
506 after TKA. While the number of modules has frequently been used as a metric for motor control,  
507 recent studies suggest that module analysis which examines the composition of modules across  
508 multiple trials may provide further insight into functional performance in tasks like walking (Allen  
509 et al. 2017). Furthermore, relationships between module organization and function have been  
510 observed in populations with neurologic movement disorders. Brough et al. (2019) found that  
511 individuals with post-stroke hemiparesis without an independent plantarflexors module  
512 demonstrated poorer locomotor function compared to patients and controls with an independent  
513 plantarflexors module. Hayes et al. (2014) also observed altered module composition and slower  
514 walking speeds in individuals with chronic incomplete spinal cord injury compared to able-bodied  
515 individuals. While there was not a significant relationship in the current study between function  
516 and module organization, as it relates to the organization of healthy individuals, the observed

517 trends toward better function in those with module organization similar to healthy controls, with  
518 several measures presenting with clinically meaningful differences between groups, indicates that  
519 there may be a relationship between module composition and function which should be explored  
520 further.

521 Investigation of the number and organization of modules over time revealed that  
522 neuromuscular control was plastic in individual participants, and this neuroplasticity may be  
523 related to functional outcomes. Previously, Hubley-Kozey et al. (2010) found that shifts in  
524 activation patterns of some muscles from before surgery to 1-year after TKA were accompanied  
525 by improvements in knee flexor and extensor strength and patient-reported outcomes (via  
526 WOMAC Index (Bellamy et al. 1988)) but were still statistically different from the patterns of  
527 asymptomatic individuals. In the present study, we observed statistically significant and clinically  
528 meaningful improvements in all functional measures from before to after surgery which  
529 accompanied population-mean decreases in several tVAF measures. While small sample sizes (n  
530 < 10 present at all time points) prevented us from using statistical analysis to assess the association  
531 between changes in function and changes in module characteristics between time points, these  
532 results suggest that there may be an underlying relationship between improvements in function  
533 and increased module complexity. Further, when comparing function at 6- to 24-months, there was  
534 a larger improvement in all functional measures for groups with proper organization than those  
535 with poor organization, with the exception of TUG (Table 3). This observation may indicate that  
536 individuals with proper module organization may have a greater capacity to improve function than  
537 those with poor organization. Though we were not able to characterize it in the present study, we  
538 believe these observations suggest that there is a relationship between changes in function and  
539 changes in modular control which should be investigated in future studies.

540 Our evidence that the neuromuscular control strategies adopted before surgery are not  
541 permanent suggests that surgical intervention and rehabilitation have an influence on modular  
542 control strategy. These results contrast Shuman et al. (2019) who found no change in the  
543 distribution of muscle weightings within modules after treatment in children with cerebral palsy.  
544 However, while the present study focuses on an orthopaedic condition rather than a neurological  
545 disorder, our results support the concepts presented by Ting et al. (2015), who suggested that  
546 neuromuscular control patterns can be influenced by rehabilitation in individuals with spinal cord  
547 injury, stroke, and Parkinson's disease. Our results also support the findings of Roelker et al.  
548 (2021) who found differences in motor modules between individuals with KOA and healthy, age-  
549 matched controls, indicating that the onset of KOA may alter neuromuscular control strategy. It  
550 remains unclear whether the changes in neural control observed in the present study resulted from  
551 changes in neuroanatomical structures (i.e. muscles, motor units, or even spinal/supraspinal  
552 structures) or are products of the neuromechanical interactions (Ting et al. 2015) caused by  
553 changes in the mechanical environment of the knee during surgery. While we did not collect  
554 detailed data on the rehabilitation plans of the participants in the present pilot study, our results  
555 suggest that changes in neuromuscular control strategies, explored through motor modules, occur  
556 throughout the treatment and rehabilitation of an orthopaedic condition.

557 The plasticity of control in this population and the association between modular control  
558 and patient function at individual time points may provide a basis for modifying rehabilitation  
559 programs to improve functional outcomes after TKA. The association between better function and  
560 a higher number of modules before and 6-months after surgery and trends toward better average  
561 function in those with proper organization 24-months after surgery suggests that the relationships  
562 between function and module number or organization may be uncoupled. Our results before and

563 6-months after TKA support the findings of others, who have suggested that higher modular  
564 complexity indicates a higher number of independent motor strategies that can be used to complete  
565 a task (Safavynia, Torres-Oviedo, and Ting 2011; Ardestani et al. 2017), thus improving  
566 adaptability and function. Our work suggests that improvements in function in TKA patients may  
567 initially present as increases in the number of modules recruited during gait and that once  
568 individuals are capable of producing complex and discrete neuromuscular control patterns, further  
569 functional improvements may present as improvements in module organization. Further  
570 investigation is needed to determine the cause of the observed changes in modular control. The  
571 findings of this future work will help to determine if such motor control changes may be driven  
572 through rehabilitation programs in order to improve patient function.

573 This pilot study was based on a secondary analysis of EMG data collected in a separate  
574 study, and as such, small sample sizes may have prevented us from observing greater associations  
575 between modular control characteristics and function. The high BMI values, which are  
576 representative of the general TKA population, resulted in increased motion artifact during EMG  
577 collection and also limited the number of available trials for analysis. Further investigation is  
578 necessary to further characterize the relationship between changes in modular control  
579 characteristics and changes in function at the population level. A larger study may provide the  
580 statistical power needed to detect more associations between modular complexity and functional  
581 outcomes.

582

## 583 **CONCLUSIONS**

584 Some performance-based and patient-reported functional measures were related to  
585 modular complexity and organization. The number and organization of modules in individuals

586 changed between the three testing time points in our study. We believe this new approach to  
587 evaluating motor control in individuals with TKA provides valuable insight into the plasticity of  
588 neural control strategies in patients and may help inform rehabilitation programs for patients  
589 demonstrating unsatisfactory outcomes. Future work will build on the findings of this pilot study  
590 and explore the influence of rehabilitation techniques, which target re-training neuromuscular  
591 control, on functional outcomes.

592

### 593 **ACKNOWLEDGEMENTS**

594 The authors thank Dr. Jacqueline M. Lewis, Dr. Gregory M. Freisinger, Dr. Elena J. Caruthers,  
595 Rachel K. Hall, and Elizabeth M. Leszcz for their contributions to data collection and processing.  
596 We also thank Drs. Jeffrey F. Granger, Andrew H. Glassman, and Matthew D. Beal, who  
597 performed the surgeries in this study.

598

### 599 **GRANTS**

600 This research was supported by the National Science Foundation Graduate Research Fellowship  
601 Program under Grant Nos. DGE-1343012 (SAR) and DGE-0822215 (EJC), a fellowship from The  
602 Ohio State University (RRK), and by Grant Number R01AR056700 from the National Institute of  
603 Arthritis and Musculoskeletal and Skin Diseases. The content is solely the responsibility of the  
604 authors and does not necessarily represent the official views of the National Institute of Arthritis  
605 and Musculoskeletal and Skin Diseases nor the National Institutes of Health.

606

### 607 **CONFLICT OF INTEREST STATEMENT**

608 None of the authors have conflicts of interest regarding the contents of this manuscript.

## 609 REFERENCES

- 610 Allen, J. L., T. M. Kesar, and L. H. Ting. 2019. "Motor module generalization across balance  
611 and walking is impaired after stroke." *J Neurophysiol* 122 (1): 277-289.  
612 <https://doi.org/10.1152/jn.00561.2018>.
- 613 Allen, J. L., J. L. McKay, A. Sawers, M. E. Hackney, and L. H. Ting. 2017. "Increased  
614 neuromuscular consistency in gait and balance after partnered, dance-based rehabilitation  
615 in Parkinson's disease." *J Neurophysiol* 118 (1): 363-373.  
616 <https://doi.org/10.1152/jn.00813.2016>.
- 617 Almeida, G. J., C. A. Schroeder, A. B. Gil, G. K. Fitzgerald, and S. R. Piva. 2010. "Interrater  
618 reliability and validity of the stair ascend/descend test in subjects with total knee  
619 arthroplasty." *Arch Phys Med Rehabil* 91 (6): 932-8.  
620 <https://doi.org/10.1016/j.apmr.2010.02.003>.
- 621 Ardestani, M. M., P. Malloy, D. Nam, A. G. Rosenberg, and M. A. Wimmer. 2017. "TKA  
622 patients with unsatisfying knee function show changes in neuromotor synergy pattern but  
623 not joint biomechanics." *J Electromyogr Kinesiol* 37: 90-100.  
624 <https://doi.org/10.1016/j.jelekin.2017.09.006>.
- 625 Bade, M. J., W. M. Kohrt, and J. E. Stevens-Lapsley. 2010. "Outcomes before and after total  
626 knee arthroplasty compared to healthy adults." *J Orthop Sports Phys Ther* 40 (9): 559-67.  
627 <https://doi.org/10.2519/jospt.2010.3317>.
- 628 Bellamy, N., W. W. Buchanan, C. H. Goldsmith, J. Campbell, and L. W. Stitt. 1988. "Validation  
629 study of WOMAC: a health status instrument for measuring clinically important patient  
630 relevant outcomes to antirheumatic drug therapy in patients with osteoarthritis of the hip  
631 or knee." *J Rheumatol* 15 (12): 1833-40.
- 632 Benedetti, M. G., F. Catani, T. W. Bilotta, M. Marcacci, E. Mariani, and S. Giannini. 2003.  
633 "Muscle activation pattern and gait biomechanics after total knee replacement." *Clin*  
634 *Biomech (Bristol, Avon)* 18 (9): 871-6.
- 635 Berman, A. T., V. J. Zarro, S. J. Bosacco, and C. Israelite. 1987. "Quantitative gait analysis after  
636 unilateral or bilateral total knee replacement." *J Bone Joint Surg Am* 69 (9): 1340-5.
- 637 Brough, L. G., S. A. Kautz, M. G. Bowden, C. M. Gregory, and R. R. Neptune. 2019. "Merged  
638 plantarflexor muscle activity is predictive of poor walking performance in post-stroke  
639 hemiparetic subjects." *J Biomech* 82: 361-367.  
640 <https://doi.org/10.1016/j.jbiomech.2018.11.011>.
- 641 Chaudhari, A. M. W., L. C. Schmitt, G. M. Freisinger, J. M. Lewis, E. E. Hutter, X. Pan, and R.  
642 A. Siston. 2019. "Perceived Instability Is Associated With Strength and Pain, Not Frontal  
643 Knee Laxity, in Patients With Advanced Knee Osteoarthritis." *J Orthop Sports Phys Ther*  
644 49 (7): 513-517. <https://doi.org/10.2519/jospt.2019.8619>.
- 645 Clark, D. J., L. H. Ting, F. E. Zajac, R. R. Neptune, and S. A. Kautz. 2010. "Merging of healthy  
646 motor modules predicts reduced locomotor performance and muscle coordination  
647 complexity post-stroke." *J Neurophysiol* 103 (2): 844-57.  
648 <https://doi.org/10.1152/jn.00825.2009>.
- 649 Davidson, B. S., D. L. Judd, A. C. Thomas, R. L. Mizner, D. G. Eckhoff, and J. E. Stevens-  
650 Lapsley. 2013. "Muscle activation and coactivation during five-time-sit-to-stand  
651 movement in patients undergoing total knee arthroplasty." *J Electromyogr Kinesiol* 23  
652 (6): 1485-93. <https://doi.org/10.1016/j.jelekin.2013.06.008>.



- 653 Dobson, F., R. S. Hinman, E. M. Roos, J. H. Abbott, P. Stratford, A. M. Davis, R. Buchbinder,  
654 L. Snyder-Mackler, Y. Henrotin, J. Thumboo, P. Hansen, and K. L. Bennell. 2013.  
655 "OARSI recommended performance-based tests to assess physical function in people  
656 diagnosed with hip or knee osteoarthritis." *Osteoarthritis Cartilage* 21 (8): 1042-52.  
657 <https://doi.org/10.1016/j.joca.2013.05.002>.
- 658 Freisinger, G. M., E. E. Hutter, J. Lewis, J. F. Granger, A. H. Glassman, M. D. Beal, X. Pan, L.  
659 C. Schmitt, R. A. Siston, and A. M. W. Chaudhari. 2017. "Relationships between varus-  
660 valgus laxity of the severely osteoarthritic knee and gait, instability, clinical performance,  
661 and function." *J Orthop Res* 35 (8): 1644-1652. <https://doi.org/10.1002/jor.23447>.
- 662 Hayes, H. B., S. A. Chvatal, M. A. French, L. H. Ting, and R. D. Trumbower. 2014.  
663 "Neuromuscular constraints on muscle coordination during overground walking in  
664 persons with chronic incomplete spinal cord injury." *Clin Neurophysiol* 125 (10): 2024-  
665 35. <https://doi.org/10.1016/j.clinph.2014.02.001>.
- 666 Hubley-Kozey, C. L., G. L. Hatfield, J. L. Astephen Wilson, and M. J. Dunbar. 2010.  
667 "Alterations in neuromuscular patterns between pre and one-year post-total knee  
668 arthroplasty." *Clin Biomech (Bristol, Avon)* 25 (10): 995-1002.  
669 <https://doi.org/10.1016/j.clinbiomech.2010.07.008>.
- 670 Ivanenko, Y. P., R. E. Poppele, and F. Lacquaniti. 2004. "Five basic muscle activation patterns  
671 account for muscle activity during human locomotion." *J Physiol* 556 (Pt 1): 267-82.  
672 <https://doi.org/10.1113/jphysiol.2003.057174>.
- 673 Jeffery, R. S., R. W. Morris, and R. A. Denham. 1991. "Coronal alignment after total knee  
674 replacement." *J Bone Joint Surg Br* 73 (5): 709-14.
- 675 Kellgren, J. H., and J. S. Lawrence. 1957. "Radiological assessment of osteo-arthritis." *Ann*  
676 *Rheum Dis* 16 (4): 494-502.
- 677 Kennedy, D. M., P. W. Stratford, J. Wessel, J. D. Gollish, and D. Penney. 2005. "Assessing  
678 stability and change of four performance measures: a longitudinal study evaluating  
679 outcome following total hip and knee arthroplasty." *BMC Musculoskelet Disord* 6: 3.  
680 <https://doi.org/10.1186/1471-2474-6-3>.
- 681 Kieliba, P., P. Tropea, E. Pirondini, M. Coscia, S. Micera, and F. Artoni. 2018. "How are Muscle  
682 Synergies Affected by Electromyography Pre-Processing?" *IEEE Trans Neural Syst*  
683 *Rehabil Eng* 26 (4): 882-893. <https://doi.org/10.1109/tnsre.2018.2810859>.
- 684 Lee, D. D., and H. S. Seung. 1999. "Learning the parts of objects by non-negative matrix  
685 factorization." *Nature* 401 (6755): 788-91. <https://doi.org/10.1038/44565>.
- 686 Lee, W. A. 1984. "Neuromotor synergies as a basis for coordinated intentional action." *J Mot*  
687 *Behav* 16 (2): 135-70.
- 688 Marmon, A. R., and L. Snyder-Mackler. 2014. "Activation deficits do not limit quadriceps  
689 strength training gains in patients after total knee arthroplasty." *Int J Sports Phys Ther* 9  
690 (3): 329-37.
- 691 Mussa-Ivaldi, F. A., S. F. Giszter, and E. Bizzi. 1994. "Linear combinations of primitives in  
692 vertebrate motor control." *Proc Natl Acad Sci U S A* 91 (16): 7534-8.
- 693 Olree, K. S., and C. L. Vaughan. 1995. "Fundamental patterns of bilateral muscle activity in  
694 human locomotion." *Biol Cybern* 73 (5): 409-14.
- 695 Rejeski, W. J., W. H. Ettinger, Jr., S. Schumaker, P. James, R. Burns, and J. T. Elam. 1995.  
696 "Assessing performance-related disability in patients with knee osteoarthritis."  
697 *Osteoarthritis Cartilage* 3 (3): 157-67.



- 698 Roelker, Sarah Anne, Rebekah R. Koehn, Elena J. Caruthers, Laura C. Schmitt, Ajit M. W.  
699 Chaudhari, and Robert A. Siston. 2021. "Effects of Age and Knee Osteoarthritis on the  
700 Modular Control of Walking: A Pilot Study." *medRxiv*: 2020.05.22.20110536.  
701 <https://doi.org/10.1101/2020.05.22.20110536>.  
702 <http://medrxiv.org/content/early/2020/05/24/2020.05.22.20110536.abstract>.
- 703 Roos, E. M., and L. S. Lohmander. 2003. "The Knee injury and Osteoarthritis Outcome Score  
704 (KOOS): from joint injury to osteoarthritis." *Health Qual Life Outcomes* 1: 64.  
705 <https://doi.org/10.1186/1477-7525-1-64>.
- 706 Safavynia, S. A., G. Torres-Oviedo, and L. H. Ting. 2011. "Muscle Synergies: Implications for  
707 Clinical Evaluation and Rehabilitation of Movement." *Top Spinal Cord Inj Rehabil* 17  
708 (1): 16-24. <https://doi.org/10.1310/sci1701-16>.
- 709 Santuz, A., A. Ekizos, L. Janshen, V. Baltzopoulos, and A. Arampatzis. 2017. "On the  
710 Methodological Implications of Extracting Muscle Synergies from Human Locomotion."  
711 *Int J Neural Syst* 27 (5): 1750007. <https://doi.org/10.1142/s0129065717500071>.
- 712 Sawers, A., J. L. Allen, and L. H. Ting. 2015. "Long-term training modifies the modular  
713 structure and organization of walking balance control." *J Neurophysiol* 114 (6): 3359-73.  
714 <https://doi.org/10.1152/jn.00758.2015>.
- 715 Shuman, B. R., M. Goudriaan, K. Desloovere, M. H. Schwartz, and K. M. Steele. 2019. "Muscle  
716 synergies demonstrate only minimal changes after treatment in cerebral palsy." *J  
717 Neuroeng Rehabil* 16 (1): 46. <https://doi.org/10.1186/s12984-019-0502-3>.
- 718 Singh, J. A., M. O'Byrne, S. Harmsen, and D. Lewallen. 2010. "Predictors of moderate-severe  
719 functional limitation after primary Total Knee Arthroplasty (TKA): 4701 TKAs at 2-  
720 years and 2935 TKAs at 5-years." *Osteoarthritis Cartilage* 18 (4): 515-21.  
721 <https://doi.org/10.1016/j.joca.2009.12.001>.
- 722 Sloan, M., A. Premkumar, and N. P. Sheth. 2018. "Projected Volume of Primary Total Joint  
723 Arthroplasty in the U.S., 2014 to 2030." *J Bone Joint Surg Am* 100 (17): 1455-1460.  
724 <https://doi.org/10.2106/jbjs.17.01617>.
- 725 Smith, A. J., D. G. Lloyd, and D. J. Wood. 2004. "Pre-surgery knee joint loading patterns during  
726 walking predict the presence and severity of anterior knee pain after total knee  
727 arthroplasty." *J Orthop Res* 22 (2): 260-6. [https://doi.org/10.1016/s0736-0266\(03\)00184-0](https://doi.org/10.1016/s0736-0266(03)00184-0).
- 728
- 729 Stulberg, S. D., P. Loan, and V. Sarin. 2002. "Computer-assisted navigation in total knee  
730 replacement: results of an initial experience in thirty-five patients." *J Bone Joint Surg Am*  
731 84-A Suppl 2: 90-8.
- 732 Su, F. C., K. A. Lai, and W. H. Hong. 1998. "Rising from chair after total knee arthroplasty."  
733 *Clin Biomech (Bristol, Avon)* 13 (3): 176-181. [https://doi.org/10.1016/s0268-  
734 0033\(97\)00039-9](https://doi.org/10.1016/s0268-0033(97)00039-9).
- 735 Ting, L. H., H. J. Chiel, R. D. Trumbower, J. L. Allen, J. L. McKay, M. E. Hackney, and T. M.  
736 Kesar. 2015. "Neuromechanical principles underlying movement modularity and their  
737 implications for rehabilitation." *Neuron* 86 (1): 38-54.  
738 <https://doi.org/10.1016/j.neuron.2015.02.042>.
- 739 Ting, L. H., and J. L. McKay. 2007. "Neuromechanics of muscle synergies for posture and  
740 movement." *Curr Opin Neurobiol* 17 (6): 622-8.  
741 <https://doi.org/10.1016/j.conb.2008.01.002>.
- 742 Torres-Oviedo, G., and L. H. Ting. 2007. "Muscle synergies characterizing human postural  
743 responses." *J Neurophysiol* 98 (4): 2144-56. <https://doi.org/10.1152/jn.01360.2006>.

- 744 Weiss, J. M., P. C. Noble, M. A. Conditt, H. W. Kohl, S. Roberts, K. F. Cook, M. J. Gordon, and  
745 K. B. Mathis. 2002. "What functional activities are important to patients with knee  
746 replacements?" *Clin Orthop Relat Res* (404): 172-88.
- 747 Wilson, S. A., P. D. McCann, R. S. Gotlin, H. K. Ramakrishnan, M. E. Wootten, and J. N. Insall.  
748 1996. "Comprehensive gait analysis in posterior-stabilized knee arthroplasty." *J*  
749 *Arthroplasty* 11 (4): 359-67. [https://doi.org/10.1016/s0883-5403\(96\)80023-4](https://doi.org/10.1016/s0883-5403(96)80023-4).
- 750 Yercan, H. S., T. Ait Si Selmi, T. S. Sugun, and P. Neyret. 2005. "Tibiofemoral instability in  
751 primary total knee replacement: a review, Part 1: Basic principles and classification."  
752 *Knee* 12 (4): 257-66. <https://doi.org/10.1016/j.knee.2005.01.004>.
- 753 Zeni, J. A., Jr., and L. Snyder-Mackler. 2010. "Early postoperative measures predict 1- and 2-  
754 year outcomes after unilateral total knee arthroplasty: importance of contralateral limb  
755 strength." *Phys Ther* 90 (1): 43-54. <https://doi.org/10.2522/ptj.20090089>.
- 756
